# Supplementary material for: Investigating the modulatory effects of Moringa oleifera on the gut microbiota of chicken model through metagenomic approach
Source: Front Vet Sci. 2023 Jun 1;10:1153769. doi: 10.3389/fvets.2023.1153769 (PMC10267347; doi:10.3389/fvets.2023.1153769)
Supplement: Supplementary file 2 [file Data_Sheet_2.xlsx]

## Sheet: Supplementary Table Content
					Supplementary Table Content
				Supplementary Table 1 : V3 V4 Primer Sequences for amplication
				Supplementary Table 2 : Summary of raw sequences data and quality
				Supplementary Table 3 : Raw Operational Taxonomic Units
				Supplementary Table 4 : Phylum abundance distribution
				Supplementary Table 5 : Genus abundance distribution
				Supplementary Table 6 : Species abundance distribution
				Supplementary Table 7 : Alpha Diversity
				Supplementary Table 8 : Beta Diversity
				Supplementary Table 9 : Functional Analysis - KEGG Category L1& L2
				Supplementary Table 10: Metagenome predictions - KEGG Category
				Supplementary Table 11: Functional Analysis - COG Category
				Supplementary Table 12: Metagenome predictions - COG Category
				Supplementary Table 13: Antibacterial Activity & MIC
				Supplementary Table 14: Antioxidant Assay
				Supplementary Table 15: Anticancer activity MTT assay

## Sheet: Supplementary Table 1
Supplementary Table 1. V3-V4 primer sequences
Sr. no.	Primer name	Primer sequence 5' --> 3'
1	V3V4F	CCTACGGGNGGCWGCAG
2	V3V4R	GACTACHVGGGTATCTAATCC

## Sheet: Supplementary Table 2
Supplementary Table 2. Summary of Raw sequence data and quality.
Sample ID	No of Reads	GC%	Read length	% Q20
SG1	148760	52.5	301	98.5
SG2	184472	52.5	301	98.78

## Sheet: Supplementary Table 3
		Supplementary Table 3. Raw Operational Taxonomic Units
OTU	Size	Kingdom	Phylum	Class	Order	Family	Genus	Species	SG1	SG2
Otu001	4808	Bacteria	Firmicutes	Clostridia	Clostridiales	Ruminococcaceae	Ruminococcaceae_unclassified	Ruminococcaceae_unclassified	20.7	9.2
Otu002	4782	Bacteria	Firmicutes	Clostridia	Clostridiales	Clostridiales_unclassified	Clostridiales_unclassified	Clostridiales_unclassified	11.56	13.56
Otu003	4520	Bacteria	Bacteroidetes	Bacteroidia	Bacteroidales	Bacteroidaceae	Bacteroides	barnesiae	5	16.65
Otu004	3353	Bacteria	Bacteria_unclassified	Bacteria_unclassified	Bacteria_unclassified	Bacteria_unclassified	Bacteria_unclassified	Bacteria_unclassified	7.41	10.27
Otu005	2834	Bacteria	Firmicutes	Clostridia	Clostridiales	Lachnospiraceae	Lachnospiraceae_unclassified	Lachnospiraceae_unclassified	3.56	11.45
Otu006	2004	Bacteria	Firmicutes	Firmicutes_unclassified	Firmicutes_unclassified	Firmicutes_unclassified	Firmicutes_unclassified	Firmicutes_unclassified	2.37	8.74
Otu007	1844	Bacteria	Firmicutes	Clostridia	Clostridiales	Ruminococcaceae	Faecalibacterium	prausnitzii	12.99	0.47
Otu008	1762	Bacteria	Bacteroidetes	Bacteroidia	Bacteroidales	Rikenellaceae	Rikenellaceae_unclassified	Rikenellaceae_unclassified	0.97	4.33
Otu009	1525	Bacteria	Firmicutes	Clostridia	Clostridiales	Ruminococcaceae	Ruminococcus	Ruminococcus_unclassified	6.91	2.69
Otu010	1447	Bacteria	Firmicutes	Clostridia	Clostridiales	Ruminococcaceae	Oscillospira	Oscillospira_unclassified	2.83	4.09
Otu011	946	Bacteria	Firmicutes	Erysipelotrichi	Erysipelotrichales	Erysipelotrichaceae	Clostridium	Clostridium_unclassified	6.91	0.05
Otu012	741	Bacteria	Firmicutes	Clostridia	Clostridiales	Lachnospiraceae	Coprococcus	Coprococcus_unclassified	0.24	4.13
Otu013	605	Bacteria	Firmicutes	Clostridia	Clostridiales	Ruminococcaceae	Subdoligranulum	variabile	2.83	1.1
Otu014	521	Bacteria	Firmicutes	Clostridia	Clostridiales	Christensenellaceae	Christensenellaceae_unclassified	Christensenellaceae_unclassified	2.6	0.81
Otu015	519	Bacteria	Firmicutes	Clostridia	Clostridiales	Ruminococcaceae	Butyricicoccus	pullicaecorum	1.01	0.96
Otu016	485	Bacteria	Firmicutes	Clostridia	Clostridia_unclassified	Clostridia_unclassified	Clostridia_unclassified	Clostridia_unclassified	2.05	1.03
Otu017	346	Bacteria	Bacteroidetes	Bacteroidia	Bacteroidales	Rikenellaceae	Alistipes	Alistipes_unclassified	0.66	1.12
Otu018	340	Bacteria	Proteobacteria	Epsilonproteobacteria	Campylobacterales	Helicobacteraceae	Helicobacter	pullorum	0.82	0.09
Otu019	322	Bacteria	Bacteroidetes	Bacteroidia	Bacteroidales	Bacteroidaceae	Bacteroides	Bacteroides_unclassified	0.36	1.29
Otu020	294	Bacteria	Cyanobacteria	4C0d-2	YS2	YS2_unclassified	YS2_unclassified	YS2_unclassified	1.11	0.54
Otu021	289	Bacteria	Tenericutes	Mollicutes	RF39	RF39_unclassified	RF39_unclassified	RF39_unclassified	1.35	0.47
Otu022	241	Bacteria	Firmicutes	Clostridia	Clostridiales	Lachnospiraceae	Dorea	Dorea_unclassified	0.66	0.81
Otu023	231	Bacteria	Firmicutes	Clostridia	Clostridiales	Lachnospiraceae	[Ruminococcus]	torques	0.39	0.9
Otu024	159	Bacteria	Proteobacteria	Deltaproteobacteria	Desulfovibrionales	Desulfovibrionaceae	Bilophila	Bilophila_unclassified	0.04	0.15
Otu025	115	Bacteria	Firmicutes	Clostridia	Clostridiales	Dehalobacteriaceae	Dehalobacterium	Dehalobacterium_unclassified	0.49	0.1
Otu026	113	Bacteria	Bacteroidetes	Bacteroidetes_unclassified	Bacteroidetes_unclassified	Bacteroidetes_unclassified	Bacteroidetes_unclassified	Bacteroidetes_unclassified	0	0.57
Otu027	105	Bacteria	Firmicutes	Clostridia	Clostridiales	Veillonellaceae	Phascolarctobacterium	Phascolarctobacterium_unclassified	0.1	0.32
Otu028	97	Bacteria	Firmicutes	Clostridia	Clostridiales	Ruminococcaceae	Ruminococcus	albus	0.36	0.05
Otu029	88	Bacteria	Proteobacteria	Betaproteobacteria	Burkholderiales	Alcaligenaceae	Sutterella	Sutterella_unclassified	0.36	0.14
Otu030	68	Bacteria	Firmicutes	Erysipelotrichi	Erysipelotrichales	Erysipelotrichaceae	cc_115	cc_115_unclassified	0.06	0.3
Otu031	64	Bacteria	Firmicutes	Clostridia	Clostridiales	Ruminococcaceae	Clostridium	methylpentosum	0.21	0.12
Otu032	64	Bacteria	Firmicutes	Erysipelotrichi	Erysipelotrichales	Erysipelotrichaceae	Clostridium	spiroforme	0	0.31
Otu033	64	Bacteria	Bacteroidetes	Bacteroidia	Bacteroidales	Bacteroidaceae	Bacteroides	fragilis	0.17	0.2
Otu034	60	Bacteria	Firmicutes	Clostridia	Clostridiales	Ruminococcaceae	Clostridium	Clostridium_unclassified	0.3	0.06
Otu035	57	Bacteria	Firmicutes	Bacilli	Lactobacillales	Lactobacillaceae	Lactobacillus	Lactobacillus_unclassified	0.1	0.21
Otu036	57	Bacteria	Firmicutes	Clostridia	Clostridiales	Lachnospiraceae	Anaerostipes	Anaerostipes_unclassified	0.39	0.02
Otu037	55	Bacteria	Bacteroidetes	Bacteroidia	Bacteroidales	Bacteroidales_unclassified	Bacteroidales_unclassified	Bacteroidales_unclassified	0.02	0.27
Otu038	55	Bacteria	Synergistetes	Synergistia	Synergistales	Synergistaceae	Synergistaceae_unclassified	Synergistaceae_unclassified	0	0
Otu039	50	Bacteria	Firmicutes	Clostridia	Clostridiales	Clostridiaceae	Clostridium	Clostridium_unclassified	0.01	0.29
Otu040	49	Bacteria	Proteobacteria	Deltaproteobacteria	Desulfovibrionales	Desulfovibrionaceae	Desulfovibrio	Desulfovibrio_unclassified	0.03	0.18
Otu041	46	Bacteria	TM7	TM7-3	CW040	F16	F16_unclassified	F16_unclassified	0	0.24
Otu042	43	Bacteria	Firmicutes	Bacilli	Lactobacillales	Lactobacillaceae	Lactobacillus	helveticus	0.02	0.05
Otu043	42	Bacteria	Firmicutes	Erysipelotrichi	Erysipelotrichales	Erysipelotrichaceae	Coprobacillus	Coprobacillus_unclassified	0.07	0.08
Otu044	38	Bacteria	Firmicutes	Bacilli	Lactobacillales	Streptococcaceae	Streptococcus	alactolyticus	0.24	0.02
Otu045	34	Bacteria	Firmicutes	Erysipelotrichi	Erysipelotrichales	Erysipelotrichaceae	Erysipelotrichaceae_unclassified	Erysipelotrichaceae_unclassified	0.04	0.11
Otu046	33	Bacteria	Firmicutes	Clostridia	Clostridiales	Veillonellaceae	Veillonellaceae_unclassified	Veillonellaceae_unclassified	0	0.17
Otu047	33	Bacteria	Firmicutes	Clostridia	Clostridiales	Lachnospiraceae	Clostridium	Clostridium_unclassified	0.02	0.04
Otu048	31	Bacteria	Firmicutes	Clostridia	Clostridiales	Lachnospiraceae	Blautia	Blautia_unclassified	0.12	0.08
Otu049	29	Bacteria	Firmicutes	Clostridia	Clostridiales	[Mogibacteriaceae]	[Mogibacteriaceae]_unclassified	[Mogibacteriaceae]_unclassified	0.04	0.09
Otu050	27	Bacteria	Bacteroidetes	Bacteroidia	Bacteroidales	S24-7	S24-7_unclassified	S24-7_unclassified	0.04	0.02
Otu051	24	Bacteria	Bacteroidetes	Bacteroidia	Bacteroidales	Rikenellaceae	Alistipes	indistinctus	0.01	0.12
Otu052	21	Bacteria	Bacteroidetes	Bacteroidia	Bacteroidales	Prevotellaceae	Prevotella	copri	0.13	0.01
Otu053	20	Bacteria	Proteobacteria	Betaproteobacteria	Burkholderiales	Burkholderiales_unclassified	Burkholderiales_unclassified	Burkholderiales_unclassified	0.07	0.05
Otu054	16	Bacteria	Firmicutes	Clostridia	Clostridiales	Ruminococcaceae	Anaerotruncus	Anaerotruncus_unclassified	0.07	0.01
Otu055	16	Bacteria	Firmicutes	Clostridia	Clostridiales	Lachnospiraceae	Defluviitalea	saccharophila	0.01	0.07
Otu056	16	Bacteria	Firmicutes	Bacilli	Lactobacillales	Lactobacillaceae	Lactobacillus	salivarius	0.04	0.04
Otu057	15	Bacteria	Firmicutes	Bacilli	Lactobacillales	Lactobacillaceae	Lactobacillaceae_unclassified	Lactobacillaceae_unclassified	0.01	0.08
Otu058	14	Bacteria	Proteobacteria	Gammaproteobacteria	Enterobacteriales	Enterobacteriaceae	Enterobacteriaceae_unclassified	Enterobacteriaceae_unclassified	0.04	0.02
Otu059	13	Bacteria	Actinobacteria	Rubrobacteria	Rubrobacterales	Rubrobacteraceae	Rubrobacter	Rubrobacter_unclassified	0.07	0.02
Otu060	13	Bacteria	Firmicutes	Bacilli	Lactobacillales	Lactobacillaceae	Lactobacillus	coleohominis	0.01	0.05
Otu061	12	Bacteria	Lentisphaerae	[Lentisphaeria]	Victivallales	Victivallaceae	Victivallaceae_unclassified	Victivallaceae_unclassified	0.04	0.01
Otu062	11	Bacteria	Proteobacteria	Proteobacteria_unclassified	Proteobacteria_unclassified	Proteobacteria_unclassified	Proteobacteria_unclassified	Proteobacteria_unclassified	0	0.03
Otu063	10	Bacteria	Cyanobacteria	Chloroplast	Streptophyta	Streptophyta_unclassified	Streptophyta_unclassified	Streptophyta_unclassified	0.05	0.01
Otu064	10	Bacteria	Actinobacteria	Coriobacteriia	Coriobacteriales	Coriobacteriaceae	Coriobacteriaceae_unclassified	Coriobacteriaceae_unclassified	0.01	0.03
Otu065	9	Bacteria	Bacteroidetes	Bacteroidia	Bacteroidales	Rikenellaceae	Alistipes	finegoldii	0	0.05
Otu066	9	Bacteria	Firmicutes	Clostridia	Clostridiales	Lachnospiraceae	Roseburia	Roseburia_unclassified	0	0.01
Otu067	9	Bacteria	Firmicutes	Erysipelotrichi	Erysipelotrichales	Erysipelotrichaceae	Asteroleplasma	anaerobium	0.05	0.01
Otu068	8	Bacteria	Proteobacteria	Deltaproteobacteria	Desulfovibrionales	Desulfovibrionaceae	Desulfovibrionaceae_unclassified	Desulfovibrionaceae_unclassified	0	0.01
Otu069	8	Archaea	Euryarchaeota	Methanomicrobia	Methanomicrobiales	Methanocorpusculaceae	Methanocorpusculum	Methanocorpusculum_unclassified	0	0
Otu070	7	Bacteria	Actinobacteria	Actinobacteria_unclassified	Actinobacteria_unclassified	Actinobacteria_unclassified	Actinobacteria_unclassified	Actinobacteria_unclassified	0.04	0.01
Otu071	7	Bacteria	Proteobacteria	Alphaproteobacteria	RF32	RF32_unclassified	RF32_unclassified	RF32_unclassified	0.04	0
Otu072	6	Bacteria	Bacteroidetes	Bacteroidia	Bacteroidales	Porphyromonadaceae	Parabacteroides	distasonis	0.04	0
Otu073	6	Bacteria	Bacteroidetes	Bacteroidia	Bacteroidales	Porphyromonadaceae	Porphyromonadaceae_unclassified	Porphyromonadaceae_unclassified	0	0
Otu074	6	Bacteria	Firmicutes	Bacilli	Bacillales	Bacillaceae	Bacillaceae_unclassified	Bacillaceae_unclassified	0	0.01
Otu075	6	Bacteria	Proteobacteria	Alphaproteobacteria	Caulobacterales	Caulobacteraceae	Brevundimonas	vesicularis	0.04	0
Otu076	5	Bacteria	Firmicutes	Bacilli	Lactobacillales	Lactobacillaceae	Lactobacillus	hamsteri	0	0.01
Otu077	5	Bacteria	Chloroflexi	Chloroflexi	AKIW781	AKIW781_unclassified	AKIW781_unclassified	AKIW781_unclassified	0.03	0.01
Otu078	5	Bacteria	Firmicutes	Erysipelotrichi	Erysipelotrichales	Erysipelotrichaceae	Clostridium	saccharogumia	0.02	0.01
Otu079	5	Bacteria	Firmicutes	Clostridia	Clostridiales	Ruminococcaceae	Anaerofilum	Anaerofilum_unclassified	0.04	0
Otu080	5	Bacteria	Verrucomicrobia	Opitutae	[Cerasicoccales]	[Cerasicoccaceae]	[Cerasicoccaceae]_unclassified	[Cerasicoccaceae]_unclassified	0.03	0.01
Otu081	4	Bacteria	Bacteroidetes	Bacteroidia	Bacteroidales	Prevotellaceae	Prevotella	Prevotella_unclassified	0.01	0.01
Otu082	4	Bacteria	Actinobacteria	Thermoleophilia	Gaiellales	Gaiellaceae	Gaiellaceae_unclassified	Gaiellaceae_unclassified	0.02	0
Otu083	4	Bacteria	Actinobacteria	Actinobacteria	Actinomycetales	Corynebacteriaceae	Corynebacterium	Corynebacterium_unclassified	0.01	0.01
Otu084	4	Bacteria	Proteobacteria	Epsilonproteobacteria	Campylobacterales	Helicobacteraceae	Helicobacter	Helicobacter_unclassified	0	0.01
Otu085	4	Bacteria	Verrucomicrobia	Verrucomicrobiae	Verrucomicrobiales	Verrucomicrobiaceae	Akkermansia	muciniphila	0	0.01
Otu086	4	Bacteria	Armatimonadetes	Armatimonadia	Armatimonadales	Armatimonadaceae	Armatimonadaceae_unclassified	Armatimonadaceae_unclassified	0.02	0.01
Otu087	4	Bacteria	Tenericutes	Mollicutes	Anaeroplasmatales	Anaeroplasmataceae	Anaeroplasma	Anaeroplasma_unclassified	0	0
Otu088	3	Bacteria	Planctomycetes	Phycisphaerae	WD2101	WD2101_unclassified	WD2101_unclassified	WD2101_unclassified	0.01	0.01
Otu089	3	Bacteria	Proteobacteria	Deltaproteobacteria	Desulfovibrionales	Desulfovibrionales_unclassified	Desulfovibrionales_unclassified	Desulfovibrionales_unclassified	0	0.02
Otu090	3	Bacteria	Actinobacteria	MB-A2-108	0319-7L14	0319-7L14_unclassified	0319-7L14_unclassified	0319-7L14_unclassified	0.02	0
Otu091	3	Bacteria	Proteobacteria	Betaproteobacteria	Betaproteobacteria_unclassified	Betaproteobacteria_unclassified	Betaproteobacteria_unclassified	Betaproteobacteria_unclassified	0.01	0.01
Otu092	3	Bacteria	Lentisphaerae	[Lentisphaeria]	Victivallales	Victivallaceae	Victivallis	vadensis	0	0.02
Otu093	3	Bacteria	Actinobacteria	Coriobacteriia	Coriobacteriales	Coriobacteriaceae	Adlercreutzia	Adlercreutzia_unclassified	0	0.01
Otu094	3	Bacteria	Planctomycetes	Planctomycetia	Pirellulales	Pirellulaceae	Pirellulaceae_unclassified	Pirellulaceae_unclassified	0.01	0.01
Otu095	3	Bacteria	Firmicutes	Bacilli	Bacillales	Bacillales_unclassified	Bacillales_unclassified	Bacillales_unclassified	0	0.01
Otu096	3	Bacteria	Chloroflexi	Thermomicrobia	JG30-KF-CM45	JG30-KF-CM45_unclassified	JG30-KF-CM45_unclassified	JG30-KF-CM45_unclassified	0.01	0
Otu097	3	Bacteria	Firmicutes	Bacilli	Lactobacillales	Streptococcaceae	Streptococcus	Streptococcus_unclassified	0.01	0
Otu098	3	Bacteria	Proteobacteria	Gammaproteobacteria	Enterobacteriales	Enterobacteriaceae	Proteus	Proteus_unclassified	0	0
Otu099	3	Bacteria	Firmicutes	Bacilli	Lactobacillales	Enterococcaceae	Enterococcus	cecorum	0.01	0.01
Otu100	3	Bacteria	Planctomycetes	Planctomycetia	Gemmatales	Isosphaeraceae	Isosphaeraceae_unclassified	Isosphaeraceae_unclassified	0.01	0.01
Otu101	3	Bacteria	Bacteroidetes	Bacteroidia	Bacteroidales	Bacteroidaceae	Bacteroides	acidifaciens	0.01	0.01
Otu102	3	Bacteria	Proteobacteria	Alphaproteobacteria	Rhizobiales	Rhizobiales_unclassified	Rhizobiales_unclassified	Rhizobiales_unclassified	0.01	0.01
Otu103	3	Bacteria	Proteobacteria	Epsilonproteobacteria	Campylobacterales	Campylobacteraceae	Campylobacter	Campylobacter_unclassified	0	0.02
Otu104	3	Bacteria	Firmicutes	Clostridia	Clostridiales	Syntrophomonadaceae	Syntrophomonas	Syntrophomonas_unclassified	0.02	0
Otu105	2	Bacteria	Bacteroidetes	Bacteroidia	Bacteroidales	Rikenellaceae	AF12	AF12_unclassified	0	0.01
Otu106	2	Bacteria	Proteobacteria	Alphaproteobacteria	Rhizobiales	Bradyrhizobiaceae	Balneimonas	Balneimonas_unclassified	0.01	0
Otu107	2	Bacteria	Verrucomicrobia	[Spartobacteria]	[Chthoniobacterales]	[Chthoniobacteraceae]	DA101	DA101_unclassified	0.01	0.01
Otu108	2	Bacteria	Proteobacteria	Deltaproteobacteria	Deltaproteobacteria_unclassified	Deltaproteobacteria_unclassified	Deltaproteobacteria_unclassified	Deltaproteobacteria_unclassified	0	0.01
Otu109	2	Bacteria	Synergistetes	Synergistia	Synergistales	Synergistaceae	Cloacibacillus	Cloacibacillus_unclassified	0	0
Otu110	2	Bacteria	Chloroflexi	C0119	C0119_unclassified	C0119_unclassified	C0119_unclassified	C0119_unclassified	0.01	0
Otu111	2	Bacteria	Acidobacteria	[Chloracidobacteria]	RB41	RB41_unclassified	RB41_unclassified	RB41_unclassified	0.01	0.01
Otu112	2	Bacteria	Chloroflexi	Chloroflexi_unclassified	Chloroflexi_unclassified	Chloroflexi_unclassified	Chloroflexi_unclassified	Chloroflexi_unclassified	0.01	0
Otu113	2	Bacteria	Firmicutes	Bacilli	Bacilli_unclassified	Bacilli_unclassified	Bacilli_unclassified	Bacilli_unclassified	0.01	0.01
Otu114	2	Bacteria	Chloroflexi	TK10	AKYG885	Dolo_23	Dolo_23_unclassified	Dolo_23_unclassified	0.01	0
Otu115	2	Bacteria	Firmicutes	Erysipelotrichi	Erysipelotrichales	Erysipelotrichaceae	Holdemania	Holdemania_unclassified	0	0.01
Otu116	2	Bacteria	Firmicutes	Clostridia	Clostridiales	Lachnospiraceae	Blautia	producta	0	0.01
Otu117	2	Bacteria	Proteobacteria	Gammaproteobacteria	Pseudomonadales	Moraxellaceae	Acinetobacter	Acinetobacter_unclassified	0.01	0
Otu118	2	Bacteria	Bacteroidetes	[Saprospirae]	[Saprospirales]	Chitinophagaceae	Chitinophagaceae_unclassified	Chitinophagaceae_unclassified	0.01	0.01
Otu119	2	Bacteria	Proteobacteria	Gammaproteobacteria	Gammaproteobacteria_unclassified	Gammaproteobacteria_unclassified	Gammaproteobacteria_unclassified	Gammaproteobacteria_unclassified	0.01	0
Otu120	2	Bacteria	Bacteroidetes	Bacteroidia	Bacteroidales	[Odoribacteraceae]	Odoribacter	Odoribacter_unclassified	0.01	0
Otu121	2	Bacteria	Actinobacteria	Thermoleophilia	Solirubrobacterales	Solirubrobacterales_unclassified	Solirubrobacterales_unclassified	Solirubrobacterales_unclassified	0.01	0
Otu122	2	Bacteria	Firmicutes	Clostridia	Clostridiales	Eubacteriaceae	Anaerofustis	Anaerofustis_unclassified	0.01	0
Otu123	2	Bacteria	Proteobacteria	Betaproteobacteria	Burkholderiales	Alcaligenaceae	Alcaligenaceae_unclassified	Alcaligenaceae_unclassified	0.01	0
Otu124	2	Bacteria	Firmicutes	Clostridia	Clostridiales	EtOH8	EtOH8_unclassified	EtOH8_unclassified	0	0
Otu125	2	Bacteria	Actinobacteria	Actinobacteria	Bifidobacteriales	Bifidobacteriaceae	Bifidobacterium	Bifidobacterium_unclassified	0.01	0
Otu126	2	Bacteria	Firmicutes	Bacilli	Bacillales	Staphylococcaceae	Staphylococcus	Staphylococcus_unclassified	0.01	0
Otu127	1	Bacteria	Firmicutes	Clostridia	Clostridiales	Lachnospiraceae	Lachnospira	Lachnospira_unclassified	0	0
Otu128	1	Bacteria	Proteobacteria	Alphaproteobacteria	Rhodospirillales	Rhodospirillaceae	Rhodospirillaceae_unclassified	Rhodospirillaceae_unclassified	0.01	0
Otu129	1	Bacteria	Firmicutes	Clostridia	Clostridiales	Veillonellaceae	Succinispira	mobilis	0	0.01
Otu130	1	Bacteria	Proteobacteria	Gammaproteobacteria	Aeromonadales	Aeromonadaceae	Aeromonas	Aeromonas_unclassified	0	0.01
Otu131	1	Bacteria	Proteobacteria	Betaproteobacteria	Burkholderiales	Comamonadaceae	Comamonadaceae_unclassified	Comamonadaceae_unclassified	0.01	0
Otu132	1	Bacteria	Actinobacteria	Actinobacteria	Actinomycetales	Dietziaceae	Dietzia	Dietzia_unclassified	0	0
Otu133	1	Bacteria	Tenericutes	Mollicutes	Mollicutes_unclassified	Mollicutes_unclassified	Mollicutes_unclassified	Mollicutes_unclassified	0	0
Otu134	1	Bacteria	Proteobacteria	Alphaproteobacteria	Caulobacterales	Caulobacteraceae	Caulobacter	vibrioides	0.01	0
Otu135	1	Bacteria	Verrucomicrobia	[Spartobacteria]	[Chthoniobacterales]	[Chthoniobacteraceae]	[Chthoniobacteraceae]_unclassified	[Chthoniobacteraceae]_unclassified	0.01	0
Otu136	1	Bacteria	Actinobacteria	Actinobacteria	Actinomycetales	Actinomycetales_unclassified	Actinomycetales_unclassified	Actinomycetales_unclassified	0	0
Otu137	1	Bacteria	Proteobacteria	Alphaproteobacteria	Rhodospirillales	Rhodospirillales_unclassified	Rhodospirillales_unclassified	Rhodospirillales_unclassified	0	0.01
Otu138	1	Bacteria	Verrucomicrobia	[Pedosphaerae]	[Pedosphaerales]	Ellin515	Ellin515_unclassified	Ellin515_unclassified	0.01	0
Otu139	1	Bacteria	Bacteroidetes	Bacteroidia	Bacteroidales	Rikenellaceae	Rikenella	Rikenella_unclassified	0.01	0
Otu140	1	Bacteria	Gemmatimonadetes	Gemm-1	Gemm-1_unclassified	Gemm-1_unclassified	Gemm-1_unclassified	Gemm-1_unclassified	0	0.01
Otu141	1	Bacteria	Firmicutes	Bacilli	Lactobacillales	Streptococcaceae	Streptococcus	anginosus	0	0.01
Otu142	1	Bacteria	Actinobacteria	Nitriliruptoria	Euzebyales	Euzebyaceae	Euzebya	Euzebya_unclassified	0.01	0
Otu143	1	Bacteria	Firmicutes	Clostridia	Clostridiales	Peptostreptococcaceae	Peptostreptococcaceae_unclassified	Peptostreptococcaceae_unclassified	0.01	0
Otu144	1	Bacteria	Firmicutes	Clostridia	Clostridiales	Lachnospiraceae	Ruminococcus	Ruminococcus_unclassified	0	0.01
Otu145	1	Bacteria	Firmicutes	Clostridia	Clostridiales	Lachnospiraceae	Lachnospira	pectinoschiza	0	0.01
Otu146	1	Bacteria	GN02	GKS2-174	GKS2-174_unclassified	GKS2-174_unclassified	GKS2-174_unclassified	GKS2-174_unclassified	0	0.01
Otu147	1	Bacteria	Proteobacteria	Alphaproteobacteria	Rhizobiales	Bradyrhizobiaceae	Bradyrhizobiaceae_unclassified	Bradyrhizobiaceae_unclassified	0	0
Otu148	1	Bacteria	Nitrospirae	Nitrospira	Nitrospirales	Nitrospiraceae	JG37-AG-70	JG37-AG-70_unclassified	0.01	0
Otu149	1	Bacteria	Firmicutes	Clostridia	Clostridiales	Peptostreptococcaceae	Clostridium	ruminantium	0.01	0
Otu150	1	Bacteria	Planctomycetes	Planctomycetia	Gemmatales	Gemmataceae	Gemmataceae_unclassified	Gemmataceae_unclassified	0	0.01
Otu151	1	Bacteria	Firmicutes	Erysipelotrichi	Erysipelotrichales	Erysipelotrichaceae	Catenibacterium	Catenibacterium_unclassified	0.01	0
Otu152	1	Bacteria	Bacteroidetes	Bacteroidia	Bacteroidales	Rikenellaceae	Alistipes	massiliensis	0	0
Otu153	1	Bacteria	Acidobacteria	Solibacteres	Solibacterales	Solibacterales_unclassified	Solibacterales_unclassified	Solibacterales_unclassified	0.01	0
Otu154	1	Bacteria	Verrucomicrobia	[Spartobacteria]	[Chthoniobacterales]	[Chthoniobacteraceae]	Chthoniobacter	Chthoniobacter_unclassified	0	0.01
Otu155	1	Bacteria	Firmicutes	Clostridia	Clostridiales	Clostridiaceae	SMB53	SMB53_unclassified	0.01	0
Otu156	1	Bacteria	Actinobacteria	Thermoleophilia	Solirubrobacterales	Solirubrobacteraceae	Solirubrobacteraceae_unclassified	Solirubrobacteraceae_unclassified	0	0.01
Otu157	1	Bacteria	Actinobacteria	Actinobacteria	Actinomycetales	Mycobacteriaceae	Mycobacterium	vaccae	0.01	0
Otu158	1	Bacteria	Proteobacteria	Gammaproteobacteria	Pseudomonadales	Pseudomonadaceae	Pseudomonas	Pseudomonas_unclassified	0.01	0
Otu159	1	Bacteria	Bacteroidetes	Bacteroidia	Bacteroidales	[Paraprevotellaceae]	[Prevotella]	[Prevotella]_unclassified	0	0
Otu160	1	Bacteria	Proteobacteria	Epsilonproteobacteria	Campylobacterales	Campylobacteraceae	Campylobacter	subantarcticus	0	0.01
Otu161	1	Bacteria	Acidobacteria	iii1-8	DS-18	DS-18_unclassified	DS-18_unclassified	DS-18_unclassified	0.01	0
Otu162	1	Bacteria	Actinobacteria	Actinobacteria	Actinomycetales	Micrococcaceae	Arthrobacter	Arthrobacter_unclassified	0	0.01
Otu163	1	Bacteria	Firmicutes	Clostridia	Clostridiales	Lachnospiraceae	[Ruminococcus]	[Ruminococcus]_unclassified	0	0.01
Otu164	1	Bacteria	Firmicutes	Erysipelotrichi	Erysipelotrichales	Erysipelotrichaceae	Clostridium	ramosum	0.01	0
Otu165	1	Bacteria	Proteobacteria	Gammaproteobacteria	Aeromonadales	Succinivibrionaceae	Succinivibrio	Succinivibrio_unclassified	0	0.01
Otu166	1	Bacteria	Proteobacteria	Alphaproteobacteria	Rhizobiales	Phyllobacteriaceae	Phyllobacteriaceae_unclassified	Phyllobacteriaceae_unclassified	0.01	0
Otu167	1	Bacteria	Firmicutes	Bacilli	Lactobacillales	Lactobacillaceae	Lactobacillus	pontis	0	0
Otu168	1	Bacteria	Proteobacteria	Alphaproteobacteria	Rhizobiales	Beijerinckiaceae	Beijerinckiaceae_unclassified	Beijerinckiaceae_unclassified	0.01	0
Otu169	1	Bacteria	Nitrospirae	Nitrospira	Nitrospirales	0319-6A21	0319-6A21_unclassified	0319-6A21_unclassified	0.01	0
Otu170	1	Bacteria	Cyanobacteria	Cyanobacteria_unclassified	Cyanobacteria_unclassified	Cyanobacteria_unclassified	Cyanobacteria_unclassified	Cyanobacteria_unclassified	0	0.01
Otu171	1	Bacteria	Gemmatimonadetes	Gemmatimonadetes	N1423WL	N1423WL_unclassified	N1423WL_unclassified	N1423WL_unclassified	0.01	0
Otu172	1	Bacteria	Proteobacteria	Alphaproteobacteria	Rhodospirillales	Acetobacteraceae	Acetobacteraceae_unclassified	Acetobacteraceae_unclassified	0.01	0
Otu173	1	Bacteria	Actinobacteria	Acidimicrobiia	Acidimicrobiales	Acidimicrobiales_unclassified	Acidimicrobiales_unclassified	Acidimicrobiales_unclassified	0.01	0
Otu174	1	Bacteria	Tenericutes	Mollicutes	Anaeroplasmatales	Anaeroplasmataceae	Anaeroplasmataceae_unclassified	Anaeroplasmataceae_unclassified	0	0
Otu175	1	Bacteria	Firmicutes	Bacilli	Lactobacillales	Lactobacillales_unclassified	Lactobacillales_unclassified	Lactobacillales_unclassified	0	0.01
Otu176	1	Bacteria	Bacteroidetes	Flavobacteriia	Flavobacteriales	Flavobacteriales_unclassified	Flavobacteriales_unclassified	Flavobacteriales_unclassified	0.01	0
Otu177	1	Bacteria	Actinobacteria	Actinobacteria	Actinomycetales	Micrococcaceae	Kocuria	rhizophila	0.01	0
Otu178	1	Bacteria	Proteobacteria	Alphaproteobacteria	Sphingomonadales	Sphingomonadaceae	Kaistobacter	Kaistobacter_unclassified	0.01	0
Otu179	1	Bacteria	Firmicutes	Clostridia	Clostridiales	Veillonellaceae	Dialister	Dialister_unclassified	0	0.01
Otu180	1	Bacteria	Actinobacteria	Actinobacteria	Actinomycetales	Streptomycetaceae	Streptomyces	Streptomyces_unclassified	0.01	0

## Sheet: Supplementary Table 4 
			Supplementary Table 4. Phylum abundance distribution
OTU	Size	Kingdom	Phylum	SG1	SG2
Otu001	24706	Bacteria	Firmicutes	80.55	62.82
Otu002	7292	Bacteria	Bacteroidetes	7.45	24.67
Otu003	744	Bacteria	Proteobacteria	1.57	0.76
Otu004	305	Bacteria	Cyanobacteria	1.16	0.56
Otu005	295	Bacteria	Tenericutes	1.35	0.47
Otu006	57	Bacteria	Actinobacteria	0.23	0.09
Otu007	57	Bacteria	Synergistetes	0	0
Otu008	46	Bacteria	TM7	0	0.24
Otu009	15	Bacteria	Lentisphaerae	0.04	0.03
Otu010	14	Bacteria	Chloroflexi	0.09	0.01
Otu011	14	Bacteria	Verrucomicrobia	0.05	0.02
Otu012	10	Bacteria	Planctomycetes	0.03	0.04
Otu013	8	Archaea	Euryarchaeota	0	0
Otu014	4	Bacteria	Armatimonadetes	0.02	0.01
Otu015	4	Bacteria	Acidobacteria	0.02	0.01
Otu016	2	Bacteria	Gemmatimonadetes	0.01	0.01
Otu017	2	Bacteria	Nitrospirae	0.01	0
Otu018	1	Bacteria	GN02	0	0.01

## Sheet: Supplementary Table 5
						Supplementary Table 5. Genus Abudance distribution
OTU	Size	Kingdom	Phylum	Class	Order	Family	Genus	SG1	SG2
Otu001	4909	Bacteria	Bacteroidetes	Bacteroidia	Bacteroidales	Bacteroidaceae	Bacteroides	5.54	18.15
Otu002	1844	Bacteria	Firmicutes	Clostridia	Clostridiales	Ruminococcaceae	Faecalibacterium	12.99	0.47
Otu003	1622	Bacteria	Firmicutes	Clostridia	Clostridiales	Ruminococcaceae	Ruminococcus	7.27	2.74
Otu004	1447	Bacteria	Firmicutes	Clostridia	Clostridiales	Ruminococcaceae	Oscillospira	2.83	4.09
Otu005	1016	Bacteria	Firmicutes	Erysipelotrichi	Erysipelotrichales	Erysipelotrichaceae	Clostridium	6.94	0.37
Otu006	741	Bacteria	Firmicutes	Clostridia	Clostridiales	Lachnospiraceae	Coprococcus	0.24	4.13
Otu007	605	Bacteria	Firmicutes	Clostridia	Clostridiales	Ruminococcaceae	Subdoligranulum	2.83	1.1
Otu008	519	Bacteria	Firmicutes	Clostridia	Clostridiales	Ruminococcaceae	Butyricicoccus	1.01	0.96
Otu009	380	Bacteria	Bacteroidetes	Bacteroidia	Bacteroidales	Rikenellaceae	Alistipes	0.67	1.29
Otu010	344	Bacteria	Proteobacteria	Epsilonproteobacteria	Campylobacterales	Helicobacteraceae	Helicobacter	0.82	0.1
Otu011	241	Bacteria	Firmicutes	Clostridia	Clostridiales	Lachnospiraceae	Dorea	0.66	0.81
Otu012	232	Bacteria	Firmicutes	Clostridia	Clostridiales	Lachnospiraceae	[Ruminococcus]	0.39	0.9
Otu013	159	Bacteria	Proteobacteria	Deltaproteobacteria	Desulfovibrionales	Desulfovibrionaceae	Bilophila	0.04	0.15
Otu014	135	Bacteria	Firmicutes	Bacilli	Lactobacillales	Lactobacillaceae	Lactobacillus	0.17	0.35
Otu015	124	Bacteria	Firmicutes	Clostridia	Clostridiales	Ruminococcaceae	Clostridium	0.51	0.19
Otu016	115	Bacteria	Firmicutes	Clostridia	Clostridiales	Dehalobacteriaceae	Dehalobacterium	0.49	0.1
Otu017	105	Bacteria	Firmicutes	Clostridia	Clostridiales	Veillonellaceae	Phascolarctobacterium	0.1	0.32
Otu018	88	Bacteria	Proteobacteria	Betaproteobacteria	Burkholderiales	Alcaligenaceae	Sutterella	0.36	0.14
Otu019	68	Bacteria	Firmicutes	Erysipelotrichi	Erysipelotrichales	Erysipelotrichaceae	cc_115	0.06	0.3
Otu020	57	Bacteria	Firmicutes	Clostridia	Clostridiales	Lachnospiraceae	Anaerostipes	0.39	0.02
Otu021	50	Bacteria	Firmicutes	Clostridia	Clostridiales	Clostridiaceae	Clostridium	0.01	0.29
Otu022	49	Bacteria	Proteobacteria	Deltaproteobacteria	Desulfovibrionales	Desulfovibrionaceae	Desulfovibrio	0.03	0.18
Otu023	42	Bacteria	Firmicutes	Erysipelotrichi	Erysipelotrichales	Erysipelotrichaceae	Coprobacillus	0.07	0.08
Otu024	42	Bacteria	Firmicutes	Bacilli	Lactobacillales	Streptococcaceae	Streptococcus	0.26	0.03
Otu025	33	Bacteria	Firmicutes	Clostridia	Clostridiales	Lachnospiraceae	Clostridium	0.02	0.04
Otu026	33	Bacteria	Firmicutes	Clostridia	Clostridiales	Lachnospiraceae	Blautia	0.12	0.09
Otu027	25	Bacteria	Bacteroidetes	Bacteroidia	Bacteroidales	Prevotellaceae	Prevotella	0.13	0.02
Otu028	16	Bacteria	Firmicutes	Clostridia	Clostridiales	Ruminococcaceae	Anaerotruncus	0.07	0.01
Otu029	16	Bacteria	Firmicutes	Clostridia	Clostridiales	Lachnospiraceae	Defluviitalea	0.01	0.07
Otu030	13	Bacteria	Actinobacteria	Rubrobacteria	Rubrobacterales	Rubrobacteraceae	Rubrobacter	0.07	0.02
Otu031	9	Bacteria	Firmicutes	Clostridia	Clostridiales	Lachnospiraceae	Roseburia	0	0.01
Otu032	9	Bacteria	Firmicutes	Erysipelotrichi	Erysipelotrichales	Erysipelotrichaceae	Asteroleplasma	0.05	0.01
Otu033	8	Archaea	Euryarchaeota	Methanomicrobia	Methanomicrobiales	Methanocorpusculaceae	Methanocorpusculum	0	0
Otu034	6	Bacteria	Bacteroidetes	Bacteroidia	Bacteroidales	Porphyromonadaceae	Parabacteroides	0.04	0
Otu035	6	Bacteria	Proteobacteria	Alphaproteobacteria	Caulobacterales	Caulobacteraceae	Brevundimonas	0.04	0
Otu036	5	Bacteria	Firmicutes	Clostridia	Clostridiales	Ruminococcaceae	Anaerofilum	0.04	0
Otu037	4	Bacteria	Actinobacteria	Actinobacteria	Actinomycetales	Corynebacteriaceae	Corynebacterium	0.01	0.01
Otu038	4	Bacteria	Verrucomicrobia	Verrucomicrobiae	Verrucomicrobiales	Verrucomicrobiaceae	Akkermansia	0	0.01
Otu039	4	Bacteria	Proteobacteria	Epsilonproteobacteria	Campylobacterales	Campylobacteraceae	Campylobacter	0	0.02
Otu040	4	Bacteria	Tenericutes	Mollicutes	Anaeroplasmatales	Anaeroplasmataceae	Anaeroplasma	0	0
Otu041	3	Bacteria	Lentisphaerae	[Lentisphaeria]	Victivallales	Victivallaceae	Victivallis	0	0.02
Otu042	3	Bacteria	Actinobacteria	Coriobacteriia	Coriobacteriales	Coriobacteriaceae	Adlercreutzia	0	0.01
Otu043	3	Bacteria	Proteobacteria	Gammaproteobacteria	Enterobacteriales	Enterobacteriaceae	Proteus	0	0
Otu044	3	Bacteria	Firmicutes	Bacilli	Lactobacillales	Enterococcaceae	Enterococcus	0.01	0.01
Otu045	3	Bacteria	Firmicutes	Clostridia	Clostridiales	Syntrophomonadaceae	Syntrophomonas	0.02	0
Otu046	2	Bacteria	Bacteroidetes	Bacteroidia	Bacteroidales	Rikenellaceae	AF12	0	0.01
Otu047	2	Bacteria	Proteobacteria	Alphaproteobacteria	Rhizobiales	Bradyrhizobiaceae	Balneimonas	0.01	0
Otu048	2	Bacteria	Verrucomicrobia	[Spartobacteria]	[Chthoniobacterales]	[Chthoniobacteraceae]	DA101	0.01	0.01
Otu049	2	Bacteria	Synergistetes	Synergistia	Synergistales	Synergistaceae	Cloacibacillus	0	0
Otu050	2	Bacteria	Firmicutes	Erysipelotrichi	Erysipelotrichales	Erysipelotrichaceae	Holdemania	0	0.01
Otu051	2	Bacteria	Proteobacteria	Gammaproteobacteria	Pseudomonadales	Moraxellaceae	Acinetobacter	0.01	0
Otu052	2	Bacteria	Bacteroidetes	Bacteroidia	Bacteroidales	[Odoribacteraceae]	Odoribacter	0.01	0
Otu053	2	Bacteria	Firmicutes	Clostridia	Clostridiales	Eubacteriaceae	Anaerofustis	0.01	0
Otu054	2	Bacteria	Firmicutes	Clostridia	Clostridiales	Lachnospiraceae	Lachnospira	0	0.01
Otu055	2	Bacteria	Actinobacteria	Actinobacteria	Bifidobacteriales	Bifidobacteriaceae	Bifidobacterium	0.01	0
Otu056	2	Bacteria	Firmicutes	Bacilli	Bacillales	Staphylococcaceae	Staphylococcus	0.01	0
Otu057	1	Bacteria	Firmicutes	Clostridia	Clostridiales	Veillonellaceae	Succinispira	0	0.01
Otu058	1	Bacteria	Proteobacteria	Gammaproteobacteria	Aeromonadales	Aeromonadaceae	Aeromonas	0	0.01
Otu059	1	Bacteria	Actinobacteria	Actinobacteria	Actinomycetales	Dietziaceae	Dietzia	0	0
Otu060	1	Bacteria	Proteobacteria	Alphaproteobacteria	Caulobacterales	Caulobacteraceae	Caulobacter	0.01	0
Otu061	1	Bacteria	Bacteroidetes	Bacteroidia	Bacteroidales	Rikenellaceae	Rikenella	0.01	0
Otu062	1	Bacteria	Actinobacteria	Nitriliruptoria	Euzebyales	Euzebyaceae	Euzebya	0.01	0
Otu063	1	Bacteria	Firmicutes	Clostridia	Clostridiales	Lachnospiraceae	Ruminococcus	0	0.01
Otu064	1	Bacteria	Nitrospirae	Nitrospira	Nitrospirales	Nitrospiraceae	JG37-AG-70	0.01	0
Otu065	1	Bacteria	Firmicutes	Clostridia	Clostridiales	Peptostreptococcaceae	Clostridium	0.01	0
Otu066	1	Bacteria	Firmicutes	Erysipelotrichi	Erysipelotrichales	Erysipelotrichaceae	Catenibacterium	0.01	0
Otu067	1	Bacteria	Verrucomicrobia	[Spartobacteria]	[Chthoniobacterales]	[Chthoniobacteraceae]	Chthoniobacter	0	0.01
Otu068	1	Bacteria	Firmicutes	Clostridia	Clostridiales	Clostridiaceae	SMB53	0.01	0
Otu069	1	Bacteria	Actinobacteria	Actinobacteria	Actinomycetales	Mycobacteriaceae	Mycobacterium	0.01	0
Otu070	1	Bacteria	Proteobacteria	Gammaproteobacteria	Pseudomonadales	Pseudomonadaceae	Pseudomonas	0.01	0
Otu071	1	Bacteria	Bacteroidetes	Bacteroidia	Bacteroidales	[Paraprevotellaceae]	[Prevotella]	0	0
Otu072	1	Bacteria	Actinobacteria	Actinobacteria	Actinomycetales	Micrococcaceae	Arthrobacter	0	0.01
Otu073	1	Bacteria	Proteobacteria	Gammaproteobacteria	Aeromonadales	Succinivibrionaceae	Succinivibrio	0	0.01
Otu074	1	Bacteria	Actinobacteria	Actinobacteria	Actinomycetales	Micrococcaceae	Kocuria	0.01	0
Otu075	1	Bacteria	Proteobacteria	Alphaproteobacteria	Sphingomonadales	Sphingomonadaceae	Kaistobacter	0.01	0
Otu076	1	Bacteria	Firmicutes	Clostridia	Clostridiales	Veillonellaceae	Dialister	0	0.01
Otu077	1	Bacteria	Actinobacteria	Actinobacteria	Actinomycetales	Streptomycetaceae	Streptomyces	0.01	0

## Sheet: Supplementary Table 6
						Supplementary Table 6. Species abudance distribution
OTU	Size	Kingdom	Phylum	Class	Order	Family	Genus	Species	SG1	SG2
Otu001	4520	Bacteria	Bacteroidetes	Bacteroidia	Bacteroidales	Bacteroidaceae	Bacteroides	barnesiae	5	16.65
Otu002	1844	Bacteria	Firmicutes	Clostridia	Clostridiales	Ruminococcaceae	Faecalibacterium	prausnitzii	12.99	0.47
Otu003	605	Bacteria	Firmicutes	Clostridia	Clostridiales	Ruminococcaceae	Subdoligranulum	variabile	2.83	1.1
Otu004	519	Bacteria	Firmicutes	Clostridia	Clostridiales	Ruminococcaceae	Butyricicoccus	pullicaecorum	1.01	0.96
Otu005	340	Bacteria	Proteobacteria	Epsilonproteobacteria	Campylobacterales	Helicobacteraceae	Helicobacter	pullorum	0.82	0.09
Otu006	231	Bacteria	Firmicutes	Clostridia	Clostridiales	Lachnospiraceae	[Ruminococcus]	torques	0.39	0.9
Otu007	97	Bacteria	Firmicutes	Clostridia	Clostridiales	Ruminococcaceae	Ruminococcus	albus	0.36	0.05
Otu008	64	Bacteria	Firmicutes	Clostridia	Clostridiales	Ruminococcaceae	Clostridium	methylpentosum	0.21	0.12
Otu009	64	Bacteria	Firmicutes	Erysipelotrichi	Erysipelotrichales	Erysipelotrichaceae	Clostridium	spiroforme	0	0.31
Otu010	64	Bacteria	Bacteroidetes	Bacteroidia	Bacteroidales	Bacteroidaceae	Bacteroides	fragilis	0.17	0.2
Otu011	43	Bacteria	Firmicutes	Bacilli	Lactobacillales	Lactobacillaceae	Lactobacillus	helveticus	0.02	0.05
Otu012	38	Bacteria	Firmicutes	Bacilli	Lactobacillales	Streptococcaceae	Streptococcus	alactolyticus	0.24	0.02
Otu013	24	Bacteria	Bacteroidetes	Bacteroidia	Bacteroidales	Rikenellaceae	Alistipes	indistinctus	0.01	0.12
Otu014	21	Bacteria	Bacteroidetes	Bacteroidia	Bacteroidales	Prevotellaceae	Prevotella	copri	0.13	0.01
Otu015	16	Bacteria	Firmicutes	Clostridia	Clostridiales	Lachnospiraceae	Defluviitalea	saccharophila	0.01	0.07
Otu016	16	Bacteria	Firmicutes	Bacilli	Lactobacillales	Lactobacillaceae	Lactobacillus	salivarius	0.04	0.04
Otu017	13	Bacteria	Firmicutes	Bacilli	Lactobacillales	Lactobacillaceae	Lactobacillus	coleohominis	0.01	0.05
Otu018	9	Bacteria	Bacteroidetes	Bacteroidia	Bacteroidales	Rikenellaceae	Alistipes	finegoldii	0	0.05
Otu019	9	Bacteria	Firmicutes	Erysipelotrichi	Erysipelotrichales	Erysipelotrichaceae	Asteroleplasma	anaerobium	0.05	0.01
Otu020	6	Bacteria	Bacteroidetes	Bacteroidia	Bacteroidales	Porphyromonadaceae	Parabacteroides	distasonis	0.04	0
Otu021	6	Bacteria	Proteobacteria	Alphaproteobacteria	Caulobacterales	Caulobacteraceae	Brevundimonas	vesicularis	0.04	0
Otu022	5	Bacteria	Firmicutes	Bacilli	Lactobacillales	Lactobacillaceae	Lactobacillus	hamsteri	0	0.01
Otu023	5	Bacteria	Firmicutes	Erysipelotrichi	Erysipelotrichales	Erysipelotrichaceae	Clostridium	saccharogumia	0.02	0.01
Otu024	4	Bacteria	Verrucomicrobia	Verrucomicrobiae	Verrucomicrobiales	Verrucomicrobiaceae	Akkermansia	muciniphila	0	0.01
Otu025	3	Bacteria	Lentisphaerae	[Lentisphaeria]	Victivallales	Victivallaceae	Victivallis	vadensis	0	0.02
Otu026	3	Bacteria	Firmicutes	Bacilli	Lactobacillales	Enterococcaceae	Enterococcus	cecorum	0.01	0.01
Otu027	3	Bacteria	Bacteroidetes	Bacteroidia	Bacteroidales	Bacteroidaceae	Bacteroides	acidifaciens	0.01	0.01
Otu028	2	Bacteria	Firmicutes	Clostridia	Clostridiales	Lachnospiraceae	Blautia	producta	0	0.01
Otu029	1	Bacteria	Firmicutes	Clostridia	Clostridiales	Veillonellaceae	Succinispira	mobilis	0	0.01
Otu030	1	Bacteria	Proteobacteria	Alphaproteobacteria	Caulobacterales	Caulobacteraceae	Caulobacter	vibrioides	0.01	0
Otu031	1	Bacteria	Firmicutes	Bacilli	Lactobacillales	Streptococcaceae	Streptococcus	anginosus	0	0.01
Otu032	1	Bacteria	Firmicutes	Clostridia	Clostridiales	Lachnospiraceae	Lachnospira	pectinoschiza	0	0.01
Otu033	1	Bacteria	Firmicutes	Clostridia	Clostridiales	Peptostreptococcaceae	Clostridium	ruminantium	0.01	0
Otu034	1	Bacteria	Bacteroidetes	Bacteroidia	Bacteroidales	Rikenellaceae	Alistipes	massiliensis	0	0
Otu035	1	Bacteria	Actinobacteria	Actinobacteria	Actinomycetales	Mycobacteriaceae	Mycobacterium	vaccae	0.01	0
Otu036	1	Bacteria	Proteobacteria	Epsilonproteobacteria	Campylobacterales	Campylobacteraceae	Campylobacter	subantarcticus	0	0.01
Otu037	1	Bacteria	Firmicutes	Erysipelotrichi	Erysipelotrichales	Erysipelotrichaceae	Clostridium	ramosum	0.01	0
Otu038	1	Bacteria	Firmicutes	Bacilli	Lactobacillales	Lactobacillaceae	Lactobacillus	pontis	0	0
Otu039	1	Bacteria	Actinobacteria	Actinobacteria	Actinomycetales	Micrococcaceae	Kocuria	rhizophila	0.01	0

## Sheet: Supplementary Table 7
				Supplementary Table 7 : Alpha Diversity
ID	Observed	Chao1	se.chao1	ACE	se.ACE	Shannon	Simpson	InvSimpson	Fisher
SG1	125	180.647	22.695	183.516	7.25141	2.81547	0.904068	10.424	19.019
SG2	116	155.176	17.165	177.793	7.45519	2.78065	0.907139	10.7688	16.7651

## Sheet: Supplementary Table 8
Supplementary Table 8 : Beta Diversity
S.No	Comparison	Statistical Test	All	Significant OTUs(p-value <=0.05)	Significant OTUs (p-value (corrected) <=0.05)
1	SG1 vs SG2	Fisher’s exact test	180	144	144
Fisher’s exact test: Between 2 samples
S.No	Comparison	Statistical Test	Unique in Sample1	Unique in Sample2	Common in sample1 and sample2
1	SG1 vs SG2	Fisher’s exact test	48	40	77
Unique SG2
OTU	Taxonomy	SG1	SG2	SG1 relative frequency (%)	SG2 relative frequency (%)	p-values	p-values (corrected)	Effect-size
Otu158	Bacteria;Actinobacteria;Actinobacteria;Actinomycetales;Micrococcaceae;Arthrobacter;Arthrobacter_unclassified;	0	5.9	0	0.00590002	0.0156234	0.0218	-0.00590002
Otu082	Bacteria;Actinobacteria;Coriobacteriia;Coriobacteriales;Coriobacteriaceae;Adlercreutzia;Adlercreutzia_unclassified;	0	11.8	0	0.0118	0.000244045	0.000529255	-0.0118
Otu151	Bacteria;Actinobacteria;Thermoleophilia;Solirubrobacterales;Solirubrobacteraceae;Solirubrobacteraceae_unclassified;Solirubrobacteraceae_unclassified;	0	5.9	0	0.00590002	0.0156234	0.0202317	-0.00590002
Otu012	Bacteria;Bacteroidetes;Bacteroidetes_unclassified;Bacteroidetes_unclassified;Bacteroidetes_unclassified;Bacteroidetes_unclassified;Bacteroidetes_unclassified;	0	566.7	0	0.566702	9.23278e-172	1.38492e-170	-0.566702
Otu098	Bacteria;Bacteroidetes;Bacteroidia;Bacteroidales;Rikenellaceae;AF12;AF12_unclassified;	0	5.9	0	0.00590002	0.0156234	0.0221433	-0.00590002
Otu044	Bacteria;Bacteroidetes;Bacteroidia;Bacteroidales;Rikenellaceae;Alistipes;finegoldii;	0	53.1	0	0.0531002	1.10201e-16	4.95906e-16	-0.0531002
Otu168	Bacteria;Cyanobacteria;Cyanobacteria_unclassified;Cyanobacteria_unclassified;Cyanobacteria_unclassified;Cyanobacteria_unclassified;Cyanobacteria_unclassified;	0	5.9	0	0.00590002	0.0156234	0.023632	-0.00590002
Otu096	Bacteria;Firmicutes;Bacilli;Bacillales;Bacillaceae;Bacillaceae_unclassified;Bacillaceae_unclassified;	0	5.9	0	0.00590002	0.0156234	0.0216323	-0.00590002
Otu084	Bacteria;Firmicutes;Bacilli;Bacillales;Bacillales_unclassified;Bacillales_unclassified;Bacillales_unclassified;	0	11.8	0	0.0118	0.000244045	0.000522954	-0.0118
Otu062	Bacteria;Firmicutes;Bacilli;Lactobacillales;Lactobacillaceae;Lactobacillus;hamsteri;	0	5.9	0	0.00590002	0.0156234	0.0219703	-0.00590002
Otu175	Bacteria;Firmicutes;Bacilli;Lactobacillales;Lactobacillales_unclassified;Lactobacillales_unclassified;Lactobacillales_unclassified;	0	5.9	0	0.00590002	0.0156234	0.0230509	-0.00590002
Otu136	Bacteria;Firmicutes;Bacilli;Lactobacillales;Streptococcaceae;Streptococcus;anginosus;	0	5.9	0	0.00590002	0.0156234	0.020678	-0.00590002
Otu159	Bacteria;Firmicutes;Clostridia;Clostridiales;Lachnospiraceae;[Ruminococcus];[Ruminococcus]_unclassified;	0	5.9	0	0.00590002	0.0156234	0.0208311	-0.00590002
Otu109	Bacteria;Firmicutes;Clostridia;Clostridiales;Lachnospiraceae;Blautia;producta;	0	11.8	0	0.0118	0.000244045	0.000549102	-0.0118
Otu140	Bacteria;Firmicutes;Clostridia;Clostridiales;Lachnospiraceae;Lachnospira;pectinoschiza;	0	5.9	0	0.00590002	0.0156234	0.0228635	-0.00590002
Otu066	Bacteria;Firmicutes;Clostridia;Clostridiales;Lachnospiraceae;Roseburia;Roseburia_unclassified;	0	11.8	0	0.0118	0.000244045	0.000535709	-0.0118
Otu139	Bacteria;Firmicutes;Clostridia;Clostridiales;Lachnospiraceae;Ruminococcus;Ruminococcus_unclassified;	0	5.9	0	0.00590002	0.0156234	0.0226791	-0.00590002
Otu179	Bacteria;Firmicutes;Clostridia;Clostridiales;Veillonellaceae;Dialister;Dialister_unclassified;	0	5.9	0	0.00590002	0.0156234	0.023435	-0.00590002
Otu121	Bacteria;Firmicutes;Clostridia;Clostridiales;Veillonellaceae;Succinispira;mobilis;	0	5.9	0	0.00590002	0.0156234	0.020527	-0.00590002
Otu024	Bacteria;Firmicutes;Clostridia;Clostridiales;Veillonellaceae;Veillonellaceae_unclassified;Veillonellaceae_unclassified;	0	171.2	0	0.171201	3.10126e-52	2.14703e-51	-0.171201
Otu031	Bacteria;Firmicutes;Erysipelotrichi;Erysipelotrichales;Erysipelotrichaceae;Clostridium;spiroforme;	0	312.9	0	0.312901	4.68529e-95	4.9609e-94	-0.312901
Otu108	Bacteria;Firmicutes;Erysipelotrichi;Erysipelotrichales;Erysipelotrichaceae;Holdemania;Holdemania_unclassified;	0	5.9	0	0.00590002	0.0156234	0.0223191	-0.00590002
Otu134	Bacteria;Gemmatimonadetes;Gemm-1;Gemm-1_unclassified;Gemm-1_unclassified;Gemm-1_unclassified;Gemm-1_unclassified;	0	5.9	0	0.00590002	0.0156234	0.0199447	-0.00590002
Otu141	Bacteria;GN02;GKS2-174;GKS2-174_unclassified;GKS2-174_unclassified;GKS2-174_unclassified;GKS2-174_unclassified;	0	5.9	0	0.00590002	0.0156234	0.0200872	-0.00590002
Otu081	Bacteria;Lentisphaerae;[Lentisphaeria];Victivallales;Victivallaceae;Victivallis;vadensis;	0	17.7	0	0.0177001	3.81144e-06	1.16281e-05	-0.0177001
Otu145	Bacteria;Planctomycetes;Planctomycetia;Gemmatales;Gemmataceae;Gemmataceae_unclassified;Gemmataceae_unclassified;	0	5.9	0	0.00590002	0.0156234	0.0203783	-0.00590002
Otu130	Bacteria;Proteobacteria;Alphaproteobacteria;Rhodospirillales;Rhodospirillales_unclassified;Rhodospirillales_unclassified;Rhodospirillales_unclassified;	0	5.9	0	0.00590002	0.0156234	0.0232414	-0.00590002
Otu101	Bacteria;Proteobacteria;Deltaproteobacteria;Deltaproteobacteria_unclassified;Deltaproteobacteria_unclassified;Deltaproteobacteria_unclassified;Deltaproteobacteria_unclassified;	0	11.8	0	0.0118	0.000244045	0.000556053	-0.0118
Otu049	Bacteria;Proteobacteria;Deltaproteobacteria;Desulfovibrionales;Desulfovibrionaceae;Desulfovibrionaceae_unclassified;Desulfovibrionaceae_unclassified;	0	11.8	0	0.0118	0.000244045	0.000542323	-0.0118
Otu078	Bacteria;Proteobacteria;Deltaproteobacteria;Desulfovibrionales;Desulfovibrionales_unclassified;Desulfovibrionales_unclassified;Desulfovibrionales_unclassified;	0	17.7	0	0.0177001	3.81144e-06	1.14343e-05	-0.0177001
Otu114	Bacteria;Proteobacteria;Epsilonproteobacteria;Campylobacterales;Campylobacteraceae;Campylobacter;Campylobacter_unclassified;	0	17.7	0	0.0177001	3.81144e-06	1.12469e-05	-0.0177001
Otu156	Bacteria;Proteobacteria;Epsilonproteobacteria;Campylobacterales;Campylobacteraceae;Campylobacter;subantarcticus;	0	5.9	0	0.00590002	0.0156234	0.0211444	-0.00590002
Otu075	Bacteria;Proteobacteria;Epsilonproteobacteria;Campylobacterales;Helicobacteraceae;Helicobacter;Helicobacter_unclassified;	0	5.9	0	0.00590002	0.0156234	0.0224976	-0.00590002
Otu122	Bacteria;Proteobacteria;Gammaproteobacteria;Aeromonadales;Aeromonadaceae;Aeromonas;Aeromonas_unclassified;	0	5.9	0	0.00590002	0.0156234	0.0209866	-0.00590002
Otu162	Bacteria;Proteobacteria;Gammaproteobacteria;Aeromonadales;Succinivibrionaceae;Succinivibrio;Succinivibrio_unclassified;	0	5.9	0	0.00590002	0.0156234	0.0213046	-0.00590002
Otu050	Bacteria;Proteobacteria;Proteobacteria_unclassified;Proteobacteria_unclassified;Proteobacteria_unclassified;Proteobacteria_unclassified;Proteobacteria_unclassified;	0	29.5	0	0.0295001	9.29159e-10	3.34497e-09	-0.0295001
Otu041	Bacteria;TM7;TM7-3;CW040;F16;F16_unclassified;F16_unclassified;	0	242	0	0.242001	1.22128e-73	1.04681e-72	-0.242001
Otu149	Bacteria;Verrucomicrobia;[Spartobacteria];[Chthoniobacterales];[Chthoniobacteraceae];Chthoniobacter;Chthoniobacter_unclassified;	0	5.9	0	0.00590002	0.0156234	0.0214672	-0.00590002
Otu090	Bacteria;Verrucomicrobia;Verrucomicrobiae;Verrucomicrobiales;Verrucomicrobiaceae;Akkermansia;muciniphila;	0	5.9	0	0.00590002	0.0156234	0.0198043	-0.00590002
	Common SG1 vs SG2
OTU	Taxonomy	SG1	SG2	SG1 relative frequency (%)	SG2 relative frequency (%)	p-values	p-values (corrected)	Effect-size
Otu104	Bacteria;Acidobacteria;[Chloracidobacteria];RB41;RB41_unclassified;RB41_unclassified;RB41_unclassified;	7.4	5.9	0.0073999	0.00590002	1	1.125	0.00149987
Otu060	Bacteria;Actinobacteria;Actinobacteria_unclassified;Actinobacteria_unclassified;Actinobacteria_unclassified;Actinobacteria_unclassified;Actinobacteria_unclassified;	36.8	11.8	0.0367995	0.0118	0.00046903	0.000981691	0.0249994
Otu071	Bacteria;Actinobacteria;Actinobacteria;Actinomycetales;Corynebacteriaceae;Corynebacterium;Corynebacterium_unclassified;	14.7	5.9	0.0146998	0.00590002	0.0783384	0.0972476	0.00879977
Otu057	Bacteria;Actinobacteria;Coriobacteriia;Coriobacteriales;Coriobacteriaceae;Coriobacteriaceae_unclassified;Coriobacteriaceae_unclassified;	7.4	29.5	0.0073999	0.0295001	0.000116003	0.000271177	-0.0221002
Otu042	Bacteria;Actinobacteria;Rubrobacteria;Rubrobacterales;Rubrobacteraceae;Rubrobacter;Rubrobacter_unclassified;	66.3	17.7	0.0662991	0.0177001	1.32527e-07	4.58746e-07	0.048599
Otu097	Bacteria;Armatimonadetes;Armatimonadia;Armatimonadales;Armatimonadaceae;Armatimonadaceae_unclassified;Armatimonadaceae_unclassified;	22.1	5.9	0.0220997	0.00590002	0.00371685	0.00769004	0.0161997
Otu003	Bacteria;Bacteria_unclassified;Bacteria_unclassified;Bacteria_unclassified;Bacteria_unclassified;Bacteria_unclassified;Bacteria_unclassified;	7407.4	10265.6	7.4073	10.2656	8.79436e-113	1.05532e-111	-2.85834
Otu111	Bacteria;Bacteroidetes;[Saprospirae];[Saprospirales];Chitinophagaceae;Chitinophagaceae_unclassified;Chitinophagaceae_unclassified;	7.4	5.9	0.0073999	0.00590002	1	1.11111	0.00149987
Otu092	Bacteria;Bacteroidetes;Bacteroidia;Bacteroidales;Bacteroidaceae;Bacteroides;acidifaciens;	7.4	5.9	0.0073999	0.00590002	1	1.10429	0.00149987
Otu018	Bacteria;Bacteroidetes;Bacteroidia;Bacteroidales;Bacteroidaceae;Bacteroides;Bacteroides_unclassified;	360.8	1292.8	0.360795	1.29281	4.64831e-124	5.9764e-123	-0.93201
Otu006	Bacteria;Bacteroidetes;Bacteroidia;Bacteroidales;Bacteroidaceae;Bacteroides;barnesiae;	4999.6	16652.9	4.99953	16.653	0	0	-11.6534
Otu065	Bacteria;Bacteroidetes;Bacteroidia;Bacteroidales;Bacteroidaceae;Bacteroides;fragilis;	169.4	200.7	0.169398	0.200701	0.0962008	0.116216	-0.0313032
Otu021	Bacteria;Bacteroidetes;Bacteroidia;Bacteroidales;Bacteroidales_unclassified;Bacteroidales_unclassified;Bacteroidales_unclassified;	22.1	271.5	0.0220997	0.271501	2.52209e-56	1.89157e-55	-0.249401
Otu039	Bacteria;Bacteroidetes;Bacteroidia;Bacteroidales;Prevotellaceae;Prevotella;copri;	125.2	11.8	0.125198	0.0118	6.8259e-25	3.41295e-24	0.113398
Otu068	Bacteria;Bacteroidetes;Bacteroidia;Bacteroidales;Prevotellaceae;Prevotella;Prevotella_unclassified;	7.4	11.8	0.0073999	0.0118	0.263152	0.311627	-0.00440015
Otu019	Bacteria;Bacteroidetes;Bacteroidia;Bacteroidales;Rikenellaceae;Alistipes;Alistipes_unclassified;	655.3	1115.7	0.655291	1.1157	1.90179e-28	1.00683e-27	-0.460414
Otu046	Bacteria;Bacteroidetes;Bacteroidia;Bacteroidales;Rikenellaceae;Alistipes;indistinctus;	14.7	124	0.0146998	0.124	8.6277e-23	4.08681e-22	-0.109301
Otu011	Bacteria;Bacteroidetes;Bacteroidia;Bacteroidales;Rikenellaceae;Rikenellaceae_unclassified;Rikenellaceae_unclassified;	971.9	4327	0.971886	4.32702	0	0	-3.35513
Otu029	Bacteria;Bacteroidetes;Bacteroidia;Bacteroidales;S24-7;S24-7_unclassified;S24-7_unclassified;	44.2	23.6	0.0441994	0.0236001	0.0205056	0.0256321	0.0205993
Otu064	Bacteria;Chloroflexi;Chloroflexi;AKIW781;AKIW781_unclassified;AKIW781_unclassified;AKIW781_unclassified;	29.5	5.9	0.0294996	0.00590002	6.9504e-05	0.000164615	0.0235996
Otu023	Bacteria;Cyanobacteria;4C0d-2;YS2;YS2_unclassified;YS2_unclassified;YS2_unclassified;	1111.8	543.1	1.11178	0.543102	1.57254e-45	9.76056e-45	0.568682
Otu056	Bacteria;Cyanobacteria;Chloroplast;Streptophyta;Streptophyta_unclassified;Streptophyta_unclassified;Streptophyta_unclassified;	51.5	11.8	0.0514993	0.0118	4.54859e-07	1.48863e-06	0.0396992
Otu106	Bacteria;Firmicutes;Bacilli;Bacilli_unclassified;Bacilli_unclassified;Bacilli_unclassified;Bacilli_unclassified;	7.4	5.9	0.0073999	0.00590002	1	1.11801	0.00149987
Otu088	Bacteria;Firmicutes;Bacilli;Lactobacillales;Enterococcaceae;Enterococcus;cecorum;	7.4	5.9	0.0073999	0.00590002	1	1.13924	0.00149987
Otu036	Bacteria;Firmicutes;Bacilli;Lactobacillales;Lactobacillaceae;Lactobacillaceae_unclassified;Lactobacillaceae_unclassified;	7.4	82.6	0.0073999	0.0826003	7.01291e-18	3.23673e-17	-0.0752004
Otu055	Bacteria;Firmicutes;Bacilli;Lactobacillales;Lactobacillaceae;Lactobacillus;coleohominis;	7.4	47.2	0.0073999	0.0472002	1.30317e-08	4.59941e-08	-0.0398003
Otu069	Bacteria;Firmicutes;Bacilli;Lactobacillales;Lactobacillaceae;Lactobacillus;helveticus;	22.1	53.1	0.0220997	0.0531002	0.000312153	0.00066103	-0.0310005
Otu033	Bacteria;Firmicutes;Bacilli;Lactobacillales;Lactobacillaceae;Lactobacillus;Lactobacillus_unclassified;	95.7	206.6	0.0956987	0.206601	1.16627e-10	4.56366e-10	-0.110902
Otu117	Bacteria;Firmicutes;Bacilli;Lactobacillales;Lactobacillaceae;Lactobacillus;salivarius;	44.2	35.4	0.0441994	0.0354001	0.368093	0.424722	0.00879924
Otu063	Bacteria;Firmicutes;Bacilli;Lactobacillales;Streptococcaceae;Streptococcus;alactolyticus;	243	23.6	0.242997	0.0236001	7.93686e-47	5.29124e-46	0.219397
Otu017	Bacteria;Firmicutes;Clostridia;Clostridia_unclassified;Clostridia_unclassified;Clostridia_unclassified;Clostridia_unclassified;	2047	1033.1	2.04697	1.0331	6.20633e-77	5.87969e-76	1.01387
Otu034	Bacteria;Firmicutes;Clostridia;Clostridiales;[Mogibacteriaceae];[Mogibacteriaceae]_unclassified;[Mogibacteriaceae]_unclassified;	36.8	94.5	0.0367995	0.0945004	3.16579e-07	1.07517e-06	-0.0577009
Otu016	Bacteria;Firmicutes;Clostridia;Clostridiales;Christensenellaceae;Christensenellaceae_unclassified;Christensenellaceae_unclassified;	2599.2	814.6	2.59916	0.814603	2.10699e-218	3.79258e-217	1.78456
Otu054	Bacteria;Firmicutes;Clostridia;Clostridiales;Clostridiaceae;Clostridium;Clostridium_unclassified;	7.4	289.3	0.0073999	0.289301	2.47863e-76	2.23077e-75	-0.281901
Otu001	Bacteria;Firmicutes;Clostridia;Clostridiales;Clostridiales_unclassified;Clostridiales_unclassified;Clostridiales_unclassified;	11560.3	13559.6	11.5601	13.5597	1.54793e-41	9.2876e-41	-1.99952
Otu026	Bacteria;Firmicutes;Clostridia;Clostridiales;Dehalobacteriaceae;Dehalobacterium;Dehalobacterium_unclassified;	493.3	100.4	0.493293	0.1004	1.617e-63	1.323e-62	0.392893
Otu072	Bacteria;Firmicutes;Clostridia;Clostridiales;Lachnospiraceae;[Ruminococcus];torques;	390.3	897.3	0.390295	0.897304	8.62317e-47	5.54347e-46	-0.507009
Otu076	Bacteria;Firmicutes;Clostridia;Clostridiales;Lachnospiraceae;Anaerostipes;Anaerostipes_unclassified;	390.3	23.6	0.390295	0.0236001	1.89139e-86	1.89139e-85	0.366694
Otu043	Bacteria;Firmicutes;Clostridia;Clostridiales;Lachnospiraceae;Blautia;Blautia_unclassified;	117.8	82.6	0.117798	0.0826003	0.0162102	0.0204044	0.035198
Otu035	Bacteria;Firmicutes;Clostridia;Clostridiales;Lachnospiraceae;Clostridium;Clostridium_unclassified;	22.1	35.4	0.0220997	0.0354001	0.0869017	0.105691	-0.0133005
Otu015	Bacteria;Firmicutes;Clostridia;Clostridiales;Lachnospiraceae;Coprococcus;Coprococcus_unclassified;	243	4132.2	0.242997	4.13222	0	0	-3.88922
Otu061	Bacteria;Firmicutes;Clostridia;Clostridiales;Lachnospiraceae;Defluviitalea;saccharophila;	14.7	70.8	0.0146998	0.0708003	4.22558e-10	1.55226e-09	-0.0561005
Otu032	Bacteria;Firmicutes;Clostridia;Clostridiales;Lachnospiraceae;Dorea;Dorea_unclassified;	662.7	808.7	0.662691	0.808703	0.000132857	0.000306593	-0.146013
Otu002	Bacteria;Firmicutes;Clostridia;Clostridiales;Lachnospiraceae;Lachnospiraceae_unclassified;Lachnospiraceae_unclassified;	3563.8	11446.3	3.56375	11.4463	0	0	-7.8826
Otu047	Bacteria;Firmicutes;Clostridia;Clostridiales;Ruminococcaceae;Anaerotruncus;Anaerotruncus_unclassified;	66.3	11.8	0.0662991	0.0118	3.4608e-10	1.32541e-09	0.054499
Otu009	Bacteria;Firmicutes;Clostridia;Clostridiales;Ruminococcaceae;Butyricicoccus;pullicaecorum;	1008.8	962.2	1.00879	0.962204	0.297747	0.34577	0.046582
Otu028	Bacteria;Firmicutes;Clostridia;Clostridiales;Ruminococcaceae;Clostridium;Clostridium_unclassified;	301.9	64.9	0.301896	0.0649003	1.08019e-37	6.0761e-37	0.236996
Otu022	Bacteria;Firmicutes;Clostridia;Clostridiales;Ruminococcaceae;Clostridium;methylpentosum;	206.2	124	0.206197	0.124	7.31508e-06	2.12373e-05	0.0821966
Otu013	Bacteria;Firmicutes;Clostridia;Clostridiales;Ruminococcaceae;Faecalibacterium;prausnitzii;	12988.7	472.3	12.9885	0.472302	0	0	12.5162
Otu007	Bacteria;Firmicutes;Clostridia;Clostridiales;Ruminococcaceae;Oscillospira;Oscillospira_unclassified;	2827.5	4090.9	2.82746	4.09092	3.7942e-54	2.73182e-53	-1.26346
Otu004	Bacteria;Firmicutes;Clostridia;Clostridiales;Ruminococcaceae;Ruminococcaceae_unclassified;Ruminococcaceae_unclassified;	20698	9203.1	20.6977	9.20314	0	0	11.4946
Otu048	Bacteria;Firmicutes;Clostridia;Clostridiales;Ruminococcaceae;Ruminococcus;albus;	360.8	53.1	0.360795	0.0531002	1.58252e-57	1.23849e-56	0.307695
Otu008	Bacteria;Firmicutes;Clostridia;Clostridiales;Ruminococcaceae;Ruminococcus;Ruminococcus_unclassified;	6914.1	2691.9	6.914	2.69191	0	0	4.22209
Otu010	Bacteria;Firmicutes;Clostridia;Clostridiales;Ruminococcaceae;Subdoligranulum;variabile;	2834.8	1098	2.83476	1.098	7.11495e-178	1.16426e-176	1.73676
Otu037	Bacteria;Firmicutes;Clostridia;Clostridiales;Veillonellaceae;Phascolarctobacterium;Phascolarctobacterium_unclassified;	95.7	324.7	0.0956987	0.324701	1.98992e-30	1.08541e-29	-0.229003
Otu073	Bacteria;Firmicutes;Erysipelotrichi;Erysipelotrichales;Erysipelotrichaceae;Asteroleplasma;anaerobium;	51.5	11.8	0.0514993	0.0118	4.54859e-07	1.5162e-06	0.0396992
Otu025	Bacteria;Firmicutes;Erysipelotrichi;Erysipelotrichales;Erysipelotrichaceae;cc_115;cc_115_unclassified;	58.9	295.2	0.0588992	0.295201	3.73675e-39	2.16972e-38	-0.236302
Otu020	Bacteria;Firmicutes;Erysipelotrichi;Erysipelotrichales;Erysipelotrichaceae;Clostridium;Clostridium_unclassified;	6906.7	47.2	6.9066	0.0472002	0	0	6.8594
Otu067	Bacteria;Firmicutes;Erysipelotrichi;Erysipelotrichales;Erysipelotrichaceae;Clostridium;saccharogumia;	22.1	11.8	0.0220997	0.0118	0.121418	0.145701	0.0102996
Otu045	Bacteria;Firmicutes;Erysipelotrichi;Erysipelotrichales;Erysipelotrichaceae;Coprobacillus;Coprobacillus_unclassified;	73.6	76.7	0.073599	0.0767003	0.807774	0.92611	-0.00310134
Otu053	Bacteria;Firmicutes;Erysipelotrichi;Erysipelotrichales;Erysipelotrichaceae;Erysipelotrichaceae_unclassified;Erysipelotrichaceae_unclassified;	36.8	112.2	0.0367995	0.1122	3.77374e-10	1.41515e-09	-0.075401
Otu005	Bacteria;Firmicutes;Firmicutes_unclassified;Firmicutes_unclassified;Firmicutes_unclassified;Firmicutes_unclassified;Firmicutes_unclassified;	2371	8742.6	2.37097	8.74263	0	0	-6.37167
Otu051	Bacteria;Lentisphaerae;[Lentisphaeria];Victivallales;Victivallaceae;Victivallaceae_unclassified;Victivallaceae_unclassified;	44.2	11.8	0.0441994	0.0118	2.08238e-05	5.94965e-05	0.0323993
Otu077	Bacteria;Planctomycetes;Phycisphaerae;WD2101;WD2101_unclassified;WD2101_unclassified;WD2101_unclassified;	14.7	5.9	0.0146998	0.00590002	0.0783384	0.0965815	0.00879977
Otu091	Bacteria;Planctomycetes;Planctomycetia;Gemmatales;Isosphaeraceae;Isosphaeraceae_unclassified;Isosphaeraceae_unclassified;	7.4	11.8	0.0073999	0.0118	0.263152	0.313691	-0.00440015
Otu083	Bacteria;Planctomycetes;Planctomycetia;Pirellulales;Pirellulaceae;Pirellulaceae_unclassified;Pirellulaceae_unclassified;	7.4	11.8	0.0073999	0.0118	0.263152	0.309591	-0.00440015
Otu093	Bacteria;Proteobacteria;Alphaproteobacteria;Rhizobiales;Rhizobiales_unclassified;Rhizobiales_unclassified;Rhizobiales_unclassified;	14.7	5.9	0.0146998	0.00590002	0.0783384	0.0959245	0.00879977
Otu080	Bacteria;Proteobacteria;Betaproteobacteria;Betaproteobacteria_unclassified;Betaproteobacteria_unclassified;Betaproteobacteria_unclassified;Betaproteobacteria_unclassified;	7.4	5.9	0.0073999	0.00590002	1	1.13208	0.00149987
Otu040	Bacteria;Proteobacteria;Betaproteobacteria;Burkholderiales;Alcaligenaceae;Sutterella;Sutterella_unclassified;	360.8	141.7	0.360795	0.141701	4.41982e-23	2.15018e-22	0.219094
Otu038	Bacteria;Proteobacteria;Betaproteobacteria;Burkholderiales;Burkholderiales_unclassified;Burkholderiales_unclassified;Burkholderiales_unclassified;	66.3	53.1	0.0662991	0.0531002	0.271106	0.316877	0.0131989
Otu030	Bacteria;Proteobacteria;Deltaproteobacteria;Desulfovibrionales;Desulfovibrionaceae;Bilophila;Bilophila_unclassified;	44.2	147.6	0.0441994	0.147601	1.47689e-14	6.48392e-14	-0.103401
Otu058	Bacteria;Proteobacteria;Deltaproteobacteria;Desulfovibrionales;Desulfovibrionaceae;Desulfovibrio;Desulfovibrio_unclassified;	29.5	177.1	0.0294996	0.177101	8.0415e-27	4.13563e-26	-0.147601
Otu027	Bacteria;Proteobacteria;Epsilonproteobacteria;Campylobacterales;Helicobacteraceae;Helicobacter;pullorum;	817.3	94.5	0.817289	0.0945004	1.69394e-144	2.34546e-143	0.722788
Otu089	Bacteria;Proteobacteria;Gammaproteobacteria;Enterobacteriales;Enterobacteriaceae;Enterobacteriaceae_unclassified;Enterobacteriaceae_unclassified;	36.8	17.7	0.0367995	0.0177001	0.0144405	0.0295374	0.0190994
Otu014	Bacteria;Tenericutes;Mollicutes;RF39;RF39_unclassified;RF39_unclassified;RF39_unclassified;	1354.8	472.3	1.35478	0.472302	1.98173e-99	2.22945e-98	0.882479
Otu100	Bacteria;Verrucomicrobia;[Spartobacteria];[Chthoniobacterales];[Chthoniobacteraceae];DA101;DA101_unclassified;	7.4	5.9	0.0073999	0.00590002	1	1.09756	0.00149987
Otu135	Bacteria;Verrucomicrobia;Opitutae;[Cerasicoccales];[Cerasicoccaceae];[Cerasicoccaceae]_unclassified;[Cerasicoccaceae]_unclassified;	29.5	5.9	0.0294996	0.00590002	6.9504e-05	0.00016681	0.0235996

## Sheet: Supplementary Table 9
Supplementary Table 9. Functional Analysis - KEGG category L1 & L2
KEGG_Pathways	SG1	SG2
Cellular Processes	510820	640479
Environmental Information Processing	1789398	2441830
Genetic Information Processing	2198399	2960933
Human Diseases	75469	103988
Metabolism	5386032	7669441
None	21373	28683
Organismal Systems	84699	112840
Unclassified	1604854	2223100
KEGG_Pathways	SG1	SG2
Amino Acid Metabolism	1110682	1555965
Biosynthesis of Other Secondary Metabolites	101241	147918
Cancers	10145	13264
Carbohydrate Metabolism	1239583	1793487
Cardiovascular Diseases	36	7
Cell Communication	0	0
Cell Growth and Death	58419	84293
Cell Motility	419663	498614
Cellular Processes and Signaling	444826	641648
Circulatory System	235	55
Digestive System	2448	3119
Endocrine System	41361	58462
Energy Metabolism	650036	898624
Environmental Adaptation	19072	24571
Enzyme Families	247083	347427
Excretory System	1748	1041
Folding, Sorting and Degradation	253358	356276
Genetic Information Processing	317999	415438
Glycan Biosynthesis and Metabolism	220425	343161
Immune System	8948	11667
Immune System Diseases	4434	8444
Infectious Diseases	38864	53615
Lipid Metabolism	355810	509919
Membrane Transport	1564434	2138549
Metabolic Diseases	10711	13819
Metabolism	288879	400235
Metabolism of Cofactors and Vitamins	455194	665292
Metabolism of Other Amino Acids	161435	232030
Metabolism of Terpenoids and Polyketides	189551	262925
Nervous System	10887	13925
Neurodegenerative Diseases	11279	14839
Nucleotide Metabolism	418174	579868
Poorly Characterized	553150	765779
Replication and Repair	966511	1312400
Sensory System	0	0
Signal Transduction	209655	282640
Signaling Molecules and Interaction	15309	20641
Transcription	351955	482734
Translation	626575	809523
Transport and Catabolism	32738	57572
Xenobiotics Biodegradation and Metabolism	236818	332825

[truncated: 6 more sheets: Supplementary 10, Supplementary Table 11, Supplementary Table 12, Supplementary Table 13, Supplementary Table 14, Supplementary Table 15]
